# Supplementary material
Source: Springer Nature journal article supplement (https://www.springermedizin.de/resource/supplementary/12990_2006_50_MOESM5_ESM.pdf/9612462)

**1 Yr SF 36 Mental Health Improvement**

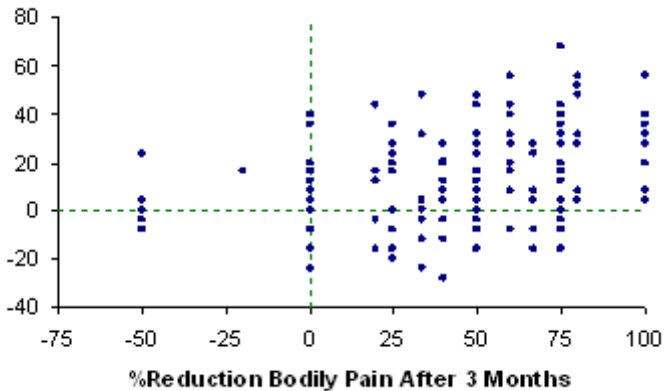

Supplement: MOESM5 [file 9612462]
